# Supplementary material for: Could microtubule inhibitors be the best choice of therapy in gastric cancer with high immune activity: mutant DYNC1H1 as a biomarker
Source: Aging (Albany NY). 2020 Nov 20;12(24):25101–19. doi: 10.18632/aging.104084 (PMC7803585; doi:10.18632/aging.104084)
Supplement: Supplementary Table 3 [file aging-12-104084-s004.xlsx]

## Sheet: TMB
Supplementary Table 3. Association of tubulin related drugs in gastric cancer cell lines with high immune activity based on GDSC database.
DRUG_NAME	Rval	Pval	PUTATIVE_TARGET
Alisertib	0.234	0.249	AURK inhibitors
CD532	0.456	0.117	AURK inhibitors
Genentech Cpd 10	-0.049	0.88	AURK inhibitors
ZM447439	0.464	0.081	AURK inhibitors
GSK1070916	-0.291	0.385	AURK inhibitors
AZD4877	0.418	0.156	KIF inhibitors
ARRY-520	0.253	0.405	KIF inhibitors
Vinblastine	0.537	0.002	microtubule inhibitors
Vinorelbine	0.529	0.005	microtubule inhibitors
Docetaxel	0.453	0.003	microtubule inhibitors
Epothilone B	0.336	0.286	microtubule inhibitors
Paclitaxel	0.405	0.12	microtubule inhibitors
Vincristine	0.629	0.028	microtubule inhibitors

## Sheet: MSI status
DRUG_NAME	Pval	PUTATIVE_TARGET
Alisertib	0.268	AURK inhibitors
CD532	0.524	AURK inhibitors
Genentech Cpd 10	0.263	AURK inhibitors
ZM447439	0.794	AURK inhibitors
GSK1070916	0.004	AURK inhibitors
AZD4877	0.159	KIF inhibitors
ARRY-520	0.98	KIF inhibitors
Vinblastine	0.095	microtubule inhibitors
Vinorelbine	0.006	microtubule inhibitors
Docetaxel	0	microtubule inhibitors
Epothilone B	0.41	microtubule inhibitors
Paclitaxel	0.183	microtubule inhibitors
Vincristine	0.404	microtubule inhibitors
